# Supplementary material for: Hospital level does not influence 30-day in-hospital mortality in road traffic accident hospitalisations - a nationwide registry study utilising Explainable AI (XAI) and the ICD-10 based injury severity score (ICISS)
Source: Research Square preprint supplement (doi:10.21203/rs.3.rs-6628847/v1), 2025-06-03
Supplement: Supplementary file 2 [file 5f19305ddaed2192b15a7c2b.docx]

| **Year** | **2008-2010** | **2011-2014** | **2015-2018** | **2019-2021** | *p-value* |
| --- | --- | --- | --- | --- | --- |
| Patients/Year | 7589 | 7117 | 6568 | 6149 |  |
| Age (Median) (25-75 percentile) | 44 (28-61) | 47 (29-63) | 50 (32-65) | 52 (34-67) | <0.001† |
| Male (%) | 15095 (66) | 19020 (67) | 17574 (67) | 12446 (67) | 0.100†† |
| ICISS (Median) (25-75 percentile) | 0,9921 (0.9757-0.9967) | 0,9915 (0.9732-0.9967) | 0,9887 (0.9686 -0.9962) | 0,9887 (0.9639-0.9961) | <0.001† |
| CCI (mean) (SD) | 0,312 (0.738) | 0,293 (0.672) | 0,319 (0.707) | 0,305 (0.689) | <0.001†† |
| Level 1 (%) | 7601 (33) | 9337 (33) | 8411 (32) | 6082 (33) | <0.001†† |
| Level 2 (%) | 9676 (43) | 12358 (43) | 12092 (46) | 8851 (48) |
| Level 3 (%) | 5489 (24) | 6774 (24) | 5768 (22) | 3515 (19) |
| Level 1 (No transfer) (%) | 6881 (33) | 8419 (32) | 7491 (32) | 5395 (32) | <0.001†† |
| Level 2 (No transfer) (%) | 8980 (43) | 11468 (44) | 10983 (46) | 8132 (49) |
| Level 3 (No transfer) (%) | 5042 (24) | 6170 (24) | 5176 (22) | 3137 (19) |

**Table. A1** Demographics over time. † Kruskal-Wallis test, †† χ2 test. ICISS,ICD-10 Injury Severity Score; CCI, Charlson Comorbidity Index; SD,Standard Deviation.
