# Supplementary material for: Hospital level does not influence 30-day in-hospital mortality in road traffic accident hospitalisations - a nationwide registry study utilising Explainable AI (XAI) and the ICD-10 based injury severity score (ICISS)
Source: Research Square preprint supplement (doi:10.21203/rs.3.rs-6628847/v1), 2025-06-03
Supplement: Supplementary file 3 [file bf19f30335b87e733c184528.docx]

| Variable | **OR** | ***p-value*** | ***90% CI*** |
| --- | --- | --- | --- |
| **All Admissions** |  |  |  |

ICISS*

15.24

<0.001

13.28 - 17.49

Age (Years)

1.04

<0.001

1.04 - 1.05

Sex (Female)

0.77

<0.001

0.67 - 0.89

CCI

1.34

<0.001

1.26 - 1.42

Year

0.96

<0.001

0.95 - 0.98

Hospital Level 2

0.84

0.012

0.73 - 0.96

Hospital Level 3

0.77

0.004

0.65 - 0.92

ICISS*

53.49

<0.001

21.24 - 136.66

Age (Years)

1.03

<0.001

1.03 - 1.04

Sex (Female)

0.92

0.60

0.69 - 1.24

CCI

1.18

0.09

0.97 - 1.42

Year

0.97

0.05

0.94 - 1.00

Hospital Level 2

0.81

0.16

0.61 - 1.08

Hospital Level 3

0.67

0.05

0.46 - 1.00

ICISS*

22.32

<0.001

18.90 - 26.36

Age (Years)

1.04

<0.001

1.04 - 1.04

Sex (Female)

0.79

0.003

0.68 - 0.92

CCI

1.3

<0.001

1.21 - 1.38

Year

0.96

<0.001

0.94 - 0.98

Hospital Level 2

0.88

0.09

0.75 - 1.02

Hospital Level 3

0.86

0.13

0.71 - 1.04

ICISS*

270.21

<0.001

60.93 - 1198.25

Age (Years)

1.02

<0.001

1.01 - 1.03

Sex (Female)

0.84

0.39

0.56 - 1.25

CCI

0.99

0.94

0.75 - 1.30

Year

0.97

0.26

0.93 - 1.02

Hospital Level 2

1.09

0.68

0.73 - 1.64

Hospital Level 3

0.91

0.76

0.48 - 1.71

**Severely Injured**

**No Transfer**

**No Transfer & Severely Injured**
