# Supplementary material for: Hospital level does not influence 30-day in-hospital mortality in road traffic accident hospitalisations - a nationwide registry study utilising Explainable AI (XAI) and the ICD-10 based injury severity score (ICISS)
Source: Research Square preprint supplement (doi:10.21203/rs.3.rs-6628847/v1), 2025-06-03
Supplement: Supplementary file 4 [file f82b19c7bcd5272ea25dd1d7.docx]

| **Hospital level** |  | **Name of Hospital** |  | **Info** |
| --- | --- | --- | --- | --- |
| Level 1 Hospitals |  |  |  |  |
|  | Akademiska Sjukhuset1 |  |  |
|  |  | KS Huddinge1 |  |  |
|  |  | KS Solna1 |  |  |
|  |  | NKS Solna1 |  | ***i*** |
|  |  | Norrlands universitetssjukhus1 |  |  |
|  |  | Sahlgrenska1 |  | ***i*** |
|  |  | SUS Lund1 |  |  |
|  |  | SUS Malmö1 |  |  |
|  |  | Universitetssjukhuset i Linköping1 |  |  |
|  |  | Universitetssjukhuset Örebro1 |  |  |
|  |  |  |  |  |
| Level 2 Hospitals |  |  |  |  |
|  | Blekingesjukhuset1 |  | ***i*** |
|  |  | Capio S:t Görans Sjukhus AB1↑ |  |  |
|  |  | Centrallasarettet Växjö1 |  |  |
|  |  | Centralsjukhuset Karlstad1 |  |  |
|  |  | Centralsjukhuset Kristianstad1 |  |  |
|  |  | Danderyds Sjukhus1↓ |  |  |
|  |  | Falu lasarett1 |  |  |
|  |  | Gävle Sjukhus1 |  |  |
|  |  | Hallands Sjukhus Halmstad1 |  | ***i*** |
|  |  | Helsingborgs lasarett1 |  |  |
|  |  | Länssjukhuset i Kalmar1 |  |  |
|  |  | Länssjukhuset Ryhov1 |  |  |
|  |  | Mälarsjukhuset1 |  |  |
|  |  | Skaraborgs sjukhus1 |  | ***i*** |
|  |  | Sunderby Sjukhus1 |  |  |
|  |  | Sundsvalls sjukhus1 |  |  |
|  |  | SÄS Borås1 |  |  |
|  |  | Södersjukhuset1 |  |  |
|  |  | Vrinnevisjukhuset i Norrköping1 |  |  |
|  |  | Västmanlands Sjukhus Västerås1 |  |  |
|  |  | Östersunds Sjukhus1 |  |  |
|  |  |  |  |  |
|  |  |  |  |  |
| Level 3 Hospitals |  | Arvika Sjukhus1 |  |  |
|  | Avesta Lasarett2 |  |  |
|  |  | Bollnäs Sjukhus1 |  |  |
|  |  | Gällivare Sjukhus1 |  |  |
|  |  | Hudiksvalls Sjukhus1 |  |  |
|  |  | Hässleholms sjukhus1 |  |  |
|  |  | Höglandssjukhuset Eksjö1 |  |  |
|  |  | Kalix Sjukhus1 |  | ***i*** |
|  |  | Karlskoga lasarett1 |  |  |
|  |  | Kiruna Lasarett2 |  |  |
|  |  | Kullbergska sjukhuset1 |  |  |
|  |  | Kungälvs sjukhus1 |  |  |
|  |  | Lasarettet Enköping1 |  |  |
|  |  | Lasarettet i Landskrona1,2 |  | ***i*** |
|  |  | Lasarettet i Motala1 |  |  |
|  |  | Lasarettet i Trelleborg1 |  |  |
|  |  | Lasarettet i Ystad1 |  |  |
|  |  | Lasarettet Ljungby1 |  |  |
|  |  | Lindesbergs lasarett1 |  | ***i*** |
|  |  | Lycksele lasarett1 |  |  |
|  |  | Mora Lasarett1 |  |  |
|  |  | Norra Älvsborgs Länssjukhus och Uddevalla Sjukhus1↓ |  | ***i*** |
|  |  | Norrtälje Sjukhus1 |  |  |
|  |  | Nyköpings lasarett1 |  |  |
|  |  | Oskarshamns sjukhus1 |  |  |
|  |  | Piteå Sjukhus1 |  |  |
|  |  | Skellefteå lasarett1 |  | ***i*** |
|  |  | Sollefteå Sjukhus1,2 |  | ***i*** |
|  |  | Södertälje Sjukhus AB1 |  |  |
|  |  | Torsby Sjukhus1 |  |  |
|  |  | Visby lasarett1 |  |  |
|  |  | Värnamo sjukhus1 |  |  |
|  |  | Västerviks sjukhus1 |  |  |
|  |  | Västmanlands Sjukhus Köping 1 |  |  |
|  |  | Ängelholms sjukhus1,2 |  |  |
|  |  | Örnsköldsviks Sjukhus1 |  |  |
| Excluded Hospitals |  | Akademikliniken Göteborg |  |  |
|  | Akademikliniken Malmö |  |  |
|  |  | Akademikliniken Stockholm |  |  |
|  |  | Aleris Obesitas Skåne |  |  |
|  |  | Aleris specialistvård Sabbatsberg |  |  |
|  |  | Allmänpsykiatrisk vård, vuxna |  |  |
|  |  | Art Clinic Göteborg |  |  |
|  |  | Art Clinic Jönköping |  |  |
|  |  | Art Clinic Uppsala |  |  |
|  |  | Arvidsjaurs sjukhem |  |  |
|  |  | Axlagården Umeå hospice |  |  |
|  |  | Bergslagssjukhuset Mitt Hjärta |  |  |
|  |  | Blackebergs sjukhus3 |  |  |
|  |  | Borlänge sjukhus3 |  |  |
|  |  | Capio Lundby Närsjukhus |  |  |
|  |  | Capio Movement Halmstad |  |  |
|  |  | Carema Rehabcentrum i Saltsjöbaden |  |  |
|  |  | Carlanderska sjukhuset |  |  |
|  |  | Dalens sjukhus2 |  |  |
|  |  | Distriktsläkarvård |  |  |
|  |  | Distriktsläkarvård och Geriatrisk rehabilitering |  |  |
|  |  | Dorotea Sjukstuga |  |  |
|  |  | Elisabethsjukhuset2 |  |  |
|  |  | Enskede Årsta Vantörs socialpsykiatriska |  |  |
|  |  | Ersta sjukhus3 |  |  |
|  |  | Farsta Årsta Vantörs socialpsykiatriska enhet |  |  |
|  |  | Geriatrisk rehabilitering |  |  |
|  |  | GynStockholm |  |  |
|  |  | Handens Närsjukhus3 |  |  |
|  |  | Handens socialpsykiatriska enhet |  |  |
|  |  | Härnösands sjukhus2 |  |  |
|  |  | Jakobsbergs sjukhus |  |  |
|  |  | Jokkmokks sjukhem |  |  |
|  |  | Kristinehamns sjukhus |  |  |
|  |  | Lasarettet i Finspång |  |  |
|  |  | Lidingö sjukhus |  |  |
|  |  | Ludvika lasarett3 |  |  |
|  |  | Långbro sjukhus |  |  |
|  |  | Löwenströmska sjukhuset |  |  |
|  |  | Malå Sjukstuga |  |  |
|  |  | Maria ungdomsmottagning |  |  |
|  |  | Mariamottagningarna |  |  |
|  |  | Nacka Närsjukhus3 |  |  |
|  |  | Nynäshamns sjukhus3 |  |  |
|  |  | Närvårdsavdelningen i Uppsala |  |  |
|  |  | Odenplans läkarhus |  |  |
|  |  | Ortho o Spine Center |  |  |
|  |  | Ortopedisk vård |  |  |
|  |  | Ortopedisk vård, Ryggsjukvård, Sjukgymnastikverksamhet |  |  |
|  |  | Pajala sjukhem |  |  |
|  |  | Psykiatriska klinikerna i Växjö |  |  |
|  |  | Regionsjukhuset Karsudden |  |  |
|  |  | Rehab Station Stockholm |  |  |
|  |  | Rehabcenter Sfären - Bräcke diakoni |  |  |
|  |  | Ryggkirurgi Strängnäs |  |  |
|  |  | Ryggkirurgiska kliniken i Strängnäs |  |  |
|  |  | Rättspsykiatriska kliniken i Säter |  |  |
|  |  | Rättspsykiatriska regionkliniken i Vadstena |  |  |
|  |  | Sabbatsbergs sjukhem |  |  |
|  |  | Simrishamns sjukhus |  |  |
|  |  | Sjukhusen i Väster |  |  |
|  |  | Sjukhuset i Säffle |  |  |
|  |  | Sollentuna sjukhus |  |  |
|  |  | Sophiahemmet2,3 |  |  |
|  |  | Sorsele Sjukstuga |  |  |
|  |  | Specialist Center Skåne AB |  |  |
|  |  | St Eriks Ögonsjukhus2 |  |  |
|  |  | Stockholms sjukhem |  |  |
|  |  | Stora Sköndals sjukhus |  |  |
|  |  | Storumans Sjukstuga |  |  |
|  |  | Södermalm Gamla Stan Socialpsykiatriska Enhet |  |  |
|  |  | Tärnaby Sjukstuga |  |  |
|  |  | Victoriakliniken |  |  |
|  |  | Vilhelmina Sjukstuga |  |  |
|  |  | Västmanlands sjukhus Sala4 |  |  |
|  |  | Ytterö behandlingshem |  |  |
|  |  | Åsele Sjukstuga |  |  |
|  |  | Öjeby sjukhem |  |  |
|  |  | Överkalix sjukhem |  |  |
|  |  | Övertorneå sjukhem |  |  |

**Table. A2** Hospital level. ↓↑Change of classification in comparison to Ydenius et al. [4] Details of the SPOR categorization can be seen in Appendix B.

1. Hospital categorized in accordance to SPOR
2. Hospital not included in SPOR. Hospital function confirmed by web-search
3. Hospital not included in SPOR. Hospital function confirmed by verbal communication with either head of hospital, head of operations, trustees, county administratives, health care responsibles
4. Hospital not included in SPOR. Hospital function determined by e-mail conversation with head of hospital, head of operations or health care responsibles

***i***

- Data retrieval was made 2008-2021. Within this time period there was a re-organization at Karolinska University Hospital leading up to the New Karolinska Hospital (NKS)
- Sahlgrenska universitetssjukhuset = Sahlgrenska THX + Sahlgrenska Östra + Sahlgrenska Mölndal + Sahlgrenska ANOPIVA in The National Board of Health and Welfare registries

***i***

- Blekingesjukhuset is divided into Karlskrona (Level 2) and Karlshamn (Level 3) in SPOR. This division is not made in the registries from the National Board of Health and Welfare and can therefore not be specified in the database. Therefore it keeps its spot in Level 2 in consistency with earlier classification according to Ydenius et al. [4]
- Hallands Sjukhus Halmstad also includes the Hospitals of Varberg and Kungsbacka as the latter two are not specified in the registries from the National Board of Health and Welfare. It keeps its spot in Level 2 in consistency with earlier classification according to Ydenius et al. [4]
- Skaraborgs Sjukhus includes Kärnsjukhuset Skövde (Level 2 in SPOR), Lidköping Hospital (Level 4 in SPOR) and Falköping Hospital (Level 4 in SPOR). The registries from the National Board of Health and Welfare put all these hospitals under the organization of Skaraborgs sjukhus without further specification. It keeps its spot in Level 2 in consistency with earlier classification according to Ydenius et al. [4]

***i***

- Lasarettet Landskrona is defined as Level 8 in SPOR, due to uncertainty of operation registration. Through web-search they are confirmed to have an Emergency room, but do not fulfil the anaesthesia requirements for Level 1 or 2. This hospital is therefore put in Level 3.
- Uddevalla Hospital and Norra Älvsborgs Länssjukhus (NÄL) are classified together in the registries from the National Board of Health and Welfare. In SPOR Uddevalla Sjukhus is downgraded to Level 4 as a transfer of emergency medicine to NÄL took place in 2008-2009, whilst emergency orthopaedics was kept at Uddevalla Sjukhus until 2015. In SPOR NÄL has also been downgraded, to a Level 3. The combination of the two hospitals are classified as Level 3 in this paper.
- Sollefteå Sjukhus is defined as Level 4 in SPOR but as Level 3 in this study as access to maternity care was not an area of interest
- Kalix Sjukhus is defined as Level 4 in SPOR but as Level 3 in this study as access to maternity care was not an area of interest
- Lindesbergs Lasarett is defined as Level 4 in SPOR but as Level 3 in this study as access to maternity care was not an area of interest
