# Supplementary figures and images for: Hospital level does not influence 30-day in-hospital mortality in road traffic accident hospitalisations - a nationwide registry study utilising Explainable AI (XAI) and the ICD-10 based injury severity score (ICISS)
Source: Research Square preprint supplement (doi:10.21203/rs.3.rs-6628847/v1), 2025-06-03

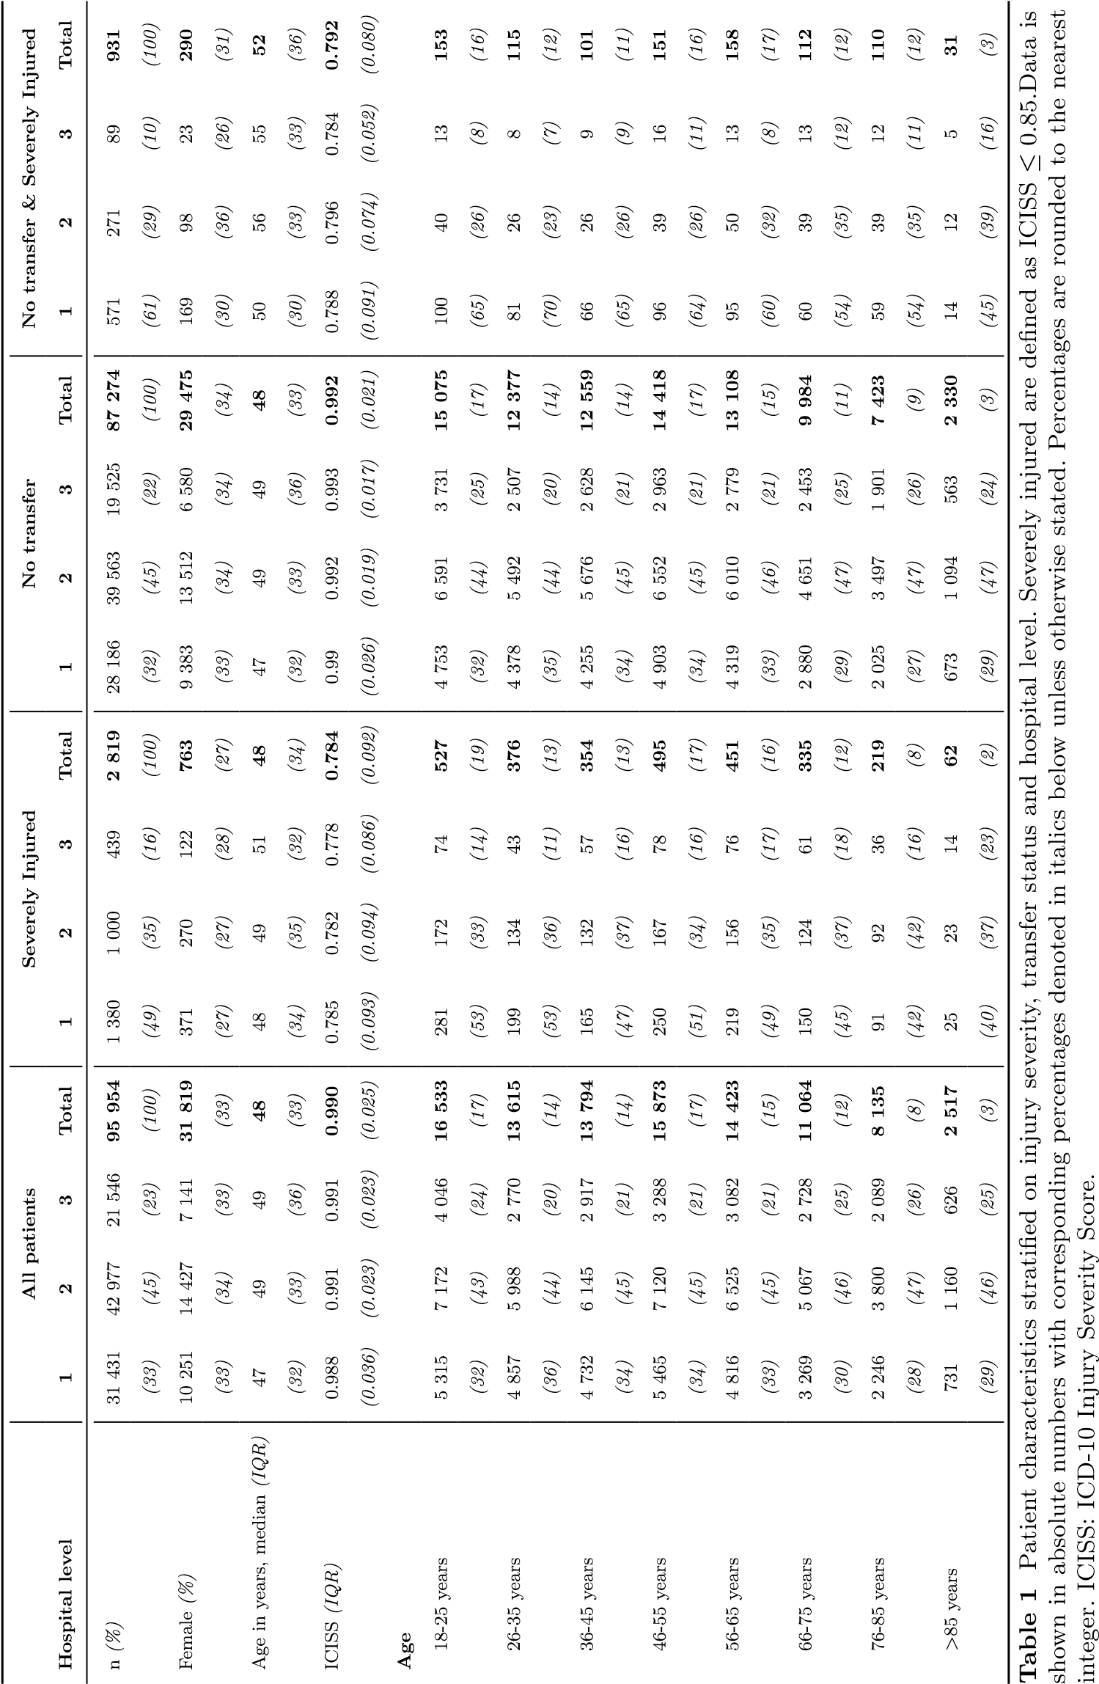

Supplement: Supplementary file 1 [file 4a93e20fb72ab9e59166cf2e.docx]
